# Supplementary material for: Conjugated linoleic acid (CLA) reduces intestinal fatty acid uptake and chylomicron formation in HFD-fed mice associated with the inhibition of DHHC7-mediated CD36 palmitoylation and the downstream ERK pathway
Source: Royal Society of Chemistry journal article supplement (doi:10.1039/d4fo00099d), 2024-01-01
Supplement: d4fo00099d1.pdf [file d4fo00099d1.pdf]

| Fig 1A   |         | HFD | 1.83 | 1.69 | 2    | 1.63 | 1.54 | 1.72 | 1.4  | 1.68 |
|----------|---------|-----|------|------|------|------|------|------|------|------|
| Serum TG | HFD+CLA | 0.9 | 1.25 | 1.31 | 1.66 | 1.41 | 1.15 | 1.47 | 1.32 |      |

| Fig 1B          |         | HFD    | 0.0703 | 0.0675 | 0.029  | 0.0543 | 0.0332 | 0.094  | 0.0358 | 0.084 |
|-----------------|---------|--------|--------|--------|--------|--------|--------|--------|--------|-------|
| Lipids in feces | HFD+CLA | 0.0652 | 0.0755 | 0.0877 | 0.0489 | 0.1201 | 0.1452 | 0.0935 | 0.1159 |       |

| Fig 1C   |     | HFD  |      |      |      |      |      |      |      |  |
|----------|-----|------|------|------|------|------|------|------|------|--|
| Serum TG | 2 h | 2.49 | 2.31 | 2.29 | 2.19 | 2.62 | 2.12 | 2.11 | 2.37 |  |
|          | 4 h | 3.64 | 3.61 | 3.33 | 3.11 | 3.39 | 3.46 | 3.42 | 3.57 |  |
|          | 6 h | 3.63 | 3.36 | 3.62 | 3.37 | 3.35 | 3.57 | 3.26 | 3.26 |  |

|  |     | HFD+CLA |      |      |      |      |      |      |      |  |
|--|-----|---------|------|------|------|------|------|------|------|--|
|  | 2 h | 2.29    | 2.14 | 2.15 | 2.4  | 2.09 | 1.47 | 1.93 | 1.65 |  |
|  | 4 h | 3.45    | 3.32 | 3.31 | 3.28 | 3.1  | 2.7  | 3.22 | 2.31 |  |
|  | 6 h | 3.13    | 3.21 | 3.15 | 3.12 | 3.2  | 2.78 | 3.21 | 3.35 |  |

Fig 1E

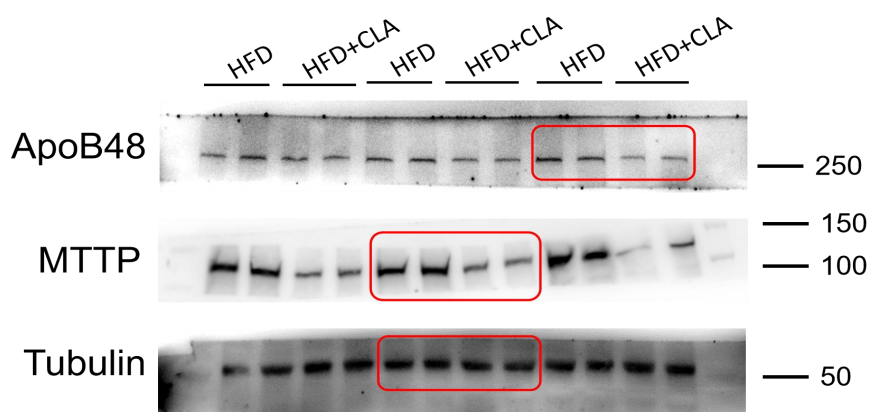

Fig 1F

|        |  | HFD     |         |         |         |         |         |
|--------|--|---------|---------|---------|---------|---------|---------|
| ApoB48 |  | 1.11308 | 1.23988 | 0.78391 | 0.87661 | 1.13131 | 0.85518 |
| MTTP   |  | 1.21674 | 0.95975 | 0.84213 | 0.89626 | 1.14922 | 0.9359  |

  

|        |  | HFD+CLA |         |         |         |         |         |
|--------|--|---------|---------|---------|---------|---------|---------|
| ApoB48 |  | 0.71204 | 0.6853  | 0.77836 | 0.9059  | 0.5375  | 0.55413 |
| MTTP   |  | 0.2046  | 0.24671 | 0.28986 | 0.30293 | 0.14238 | 0.17584 |

|                    |                |       |       |       |       |       |       |
|--------------------|----------------|-------|-------|-------|-------|-------|-------|
| Fig 2A             | PA             | 33513 | 34783 | 43645 | 36068 | 31618 | 33265 |
| Fluorescence value | PA+c9,t11-CLA  | 25632 | 26135 | 30758 | 28306 | 27428 | 28875 |
|                    | PA+t10,c12-CLA | 31025 | 36197 | 36676 | 41146 | 44092 | 33444 |

|        |                |       |       |       |       |       |       |       |       |
|--------|----------------|-------|-------|-------|-------|-------|-------|-------|-------|
| Fig 2C | PA             | 0.1   | 0.089 | 0.134 | 0.076 | 0.097 | 0.12  | 0.069 | 0.15  |
| TG     | PA+c9,t11-CLA  | 0.078 | 0.082 | 0.061 | 0.058 | 0.067 | 0.083 | 0.051 | 0.073 |
|        | PA+t10,c12-CLA | 0.16  | 0.057 | 0.098 | 0.088 | 0.13  | 0.14  | 0.086 | 0.073 |

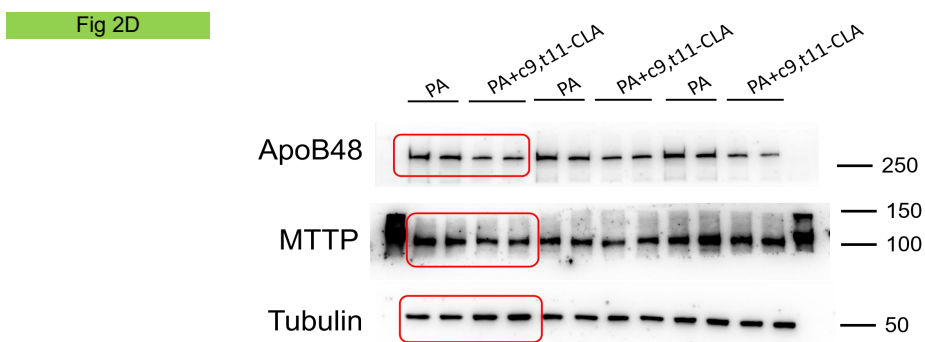

|        |               |         |         |         |         |        |         |
|--------|---------------|---------|---------|---------|---------|--------|---------|
| Fig 2E | PA            |         |         |         |         |        |         |
|        | ApoB48        | 1.1     | 0.76    | 1.29    | 1.19    | 0.87   | 0.79    |
|        | MTTP          | 1.31191 | 0.91546 | 0.93973 | 0.79134 | 0.8345 | 1.20701 |
|        | PA+c9,t11-CLA |         |         |         |         |        |         |
|        | ApoB48        | 0.22    | 0.29    | 0.36    | 0.47    | 0.27   | 0.12    |
|        | MTTP          | 0.43328 | 0.40809 | 0.46739 | 0.81203 | 1.1195 | 0.76714 |

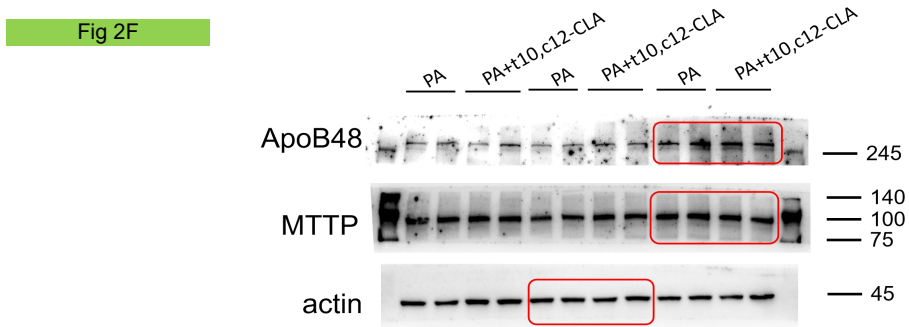

|        |                |         |         |         |         |         |         |
|--------|----------------|---------|---------|---------|---------|---------|---------|
| Fig 2G | PA             |         |         |         |         |         |         |
|        | ApoB48         | 0.47    | 0.65    | 0.42    | 0.56    | 1.51    | 2.4     |
|        | MTTP           | 0.88891 | 1.17408 | 0.57361 | 0.84138 | 1.31562 | 1.20683 |
|        | PA+t10,c12-CLA |         |         |         |         |         |         |
|        | ApoB48         | 0.26    | 0.52    | 1.18    | 0.72    | 2.7     | 1.23    |
|        | MTTP           | 0.81942 | 0.78575 | 1.18769 | 0.84148 | 1.4626  | 0.72875 |

Fig 3B

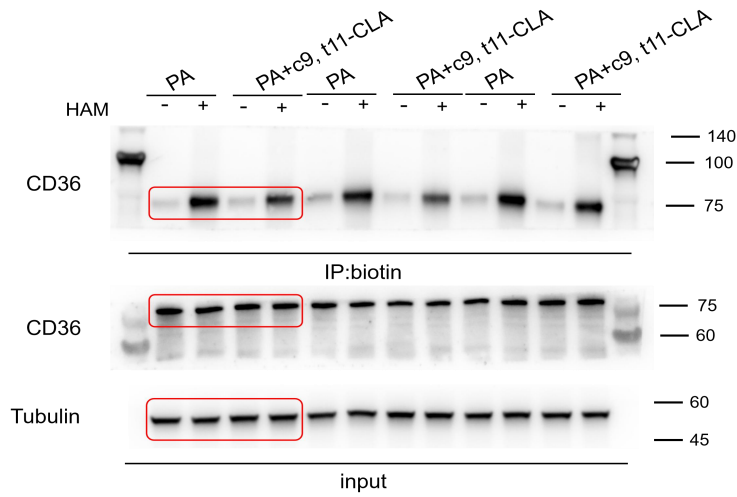

Fig 3C

|               |         |         |         |
|---------------|---------|---------|---------|
| PA            | 0.84638 | 0.7679  | 1.38561 |
| PA+c9,t11-CLA | 0.26365 | 0.29108 | 0.58009 |

Fig 3D

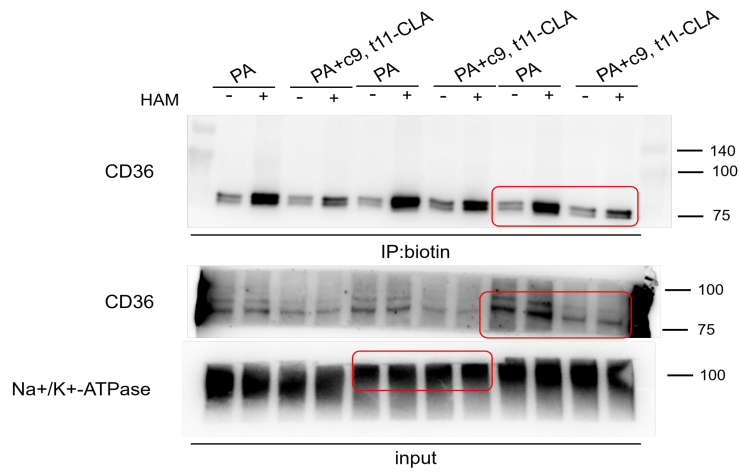

Fig 3E

|               |        |         |         |
|---------------|--------|---------|---------|
| PA            | 0.9826 | 0.89129 | 1.12681 |
| PA+c9,t11-CLA | 0.2917 | 0.65871 | 0.62533 |

| Fig 4A | PA      |         |         |         |         |         |         |         |
|--------|---------|---------|---------|---------|---------|---------|---------|---------|
| DHHC1  | 0.83397 | 0.93932 | 2.29304 | 0.7273  | 1.05084 | 0.77839 | 0.73894 | 0.67987 |
| DHHC2  | 0.81035 | 0.76655 | 2.23099 | 0.65185 | 0.92784 | 0.91547 | 0.89722 | 0.63798 |
| DHHC3  | 0.86544 | 0.78798 | 2.21372 | 0.65905 | 0.94783 | 0.94342 | 0.84631 | 0.74053 |
| DHHC4  | 0.54554 | 0.79129 | 2.22471 | 0.6573  | 1.03223 | 1.0037  | 0.98573 | 0.80885 |
| DHHC5  | 1.593   | 0.607   | 0.5649  | 0.355   | 0.747   | 2.008   | 1.125   |         |
| DHHC6  | 0.61397 | 0.59224 | 1.52184 | 0.57351 | 0.98074 | 1.32045 | 1.33974 | 1.05418 |
| DHHC7  | 1.032   | 1.842   | 0.561   | 0.48    | 1.334   | 0.751   |         |         |
| DHHC8  | 1.511   | 0.643   | 0.613   | 0.316   | 0.719   | 1.947   | 1.25    |         |
| DHHC9  | 0.74631 | 0.71437 | 1.85037 | 0.54115 | 0.78899 | 1.19001 | 1.14146 | 1.02271 |
| DHHC11 | 0.66775 | 0.369   | 2.15118 | 0.39872 | 0.93015 | 1.24272 | 1.20555 | 1.04674 |
| DHHC12 | 0.87647 | 0.77908 | 1.97871 | 0.67809 | 0.89994 | 0.98648 | 0.9139  | 0.8876  |
| DHHC13 | 0.69572 | 0.67398 | 1.58361 | 0.78008 | 1.21465 | 1.05402 |         |         |
| DHHC14 | 0.041   | 2.034   | 0.193   | 0.123   | 0.247   | 3.371   |         |         |
| DHHC15 | 0.63748 | 0.76736 | 1.6813  | 0.52566 | 0.63618 | 1.28917 | 1.23753 | 1.2323  |
| DHHC16 | 0.65874 | 0.72615 | 1.81798 | 0.54661 | 0.79932 | 1.56436 | 1.06547 | 0.82307 |
| DHHC17 | 0.79492 | 0.71496 | 2.2061  | 0.33361 | 1.00816 | 1.07097 | 0.92525 |         |
| DHHC18 | 0.8213  | 0.6266  | 2.03751 | 0.64231 | 0.98168 | 0.97521 | 1.06091 | 0.87093 |
| DHHC19 | 0.067   | 1.588   | 0.642   | 0.487   | 0.3     | 0.302   | 2.932   | 1.694   |
| DHHC20 | 1.292   | 0.609   | 0.669   | 0.306   | 0.749   | 2.103   | 1.273   |         |
| DHHC21 | 0.7712  | 0.87316 | 2.06532 | 0.71185 | 0.65383 | 0.95167 | 1.07509 | 0.90903 |
| DHHC22 | 0.75589 | 0.96258 | 3.03616 | 0.86449 | 1.03976 | 0.30744 | 0.37318 | 0.65926 |
| DHHC23 | 0.78858 | 0.69201 | 2.0779  | 0.66419 | 1.04153 | 0.89667 | 1.00442 | 0.83455 |
| DHHC24 | 0.35491 | 0.79795 | 2.09771 | 0.62797 | 0.9605  | 1.00832 | 1.2372  | 0.9165  |

|        | PA+c9,t11-CLA |         |         |         |         |         |         |         |
|--------|---------------|---------|---------|---------|---------|---------|---------|---------|
| DHHC1  | 0.89521       | 0.71597 | 0.82219 | 0.90188 | 0.78312 | 0.95288 | 1.02255 | 0.87716 |
| DHHC2  | 1.07995       | 0.63284 | 0.8477  | 0.85971 | 0.61261 | 1.30278 | 1.16611 | 1.07366 |
| DHHC3  | 1.45298       | 0.99836 | 1.0032  | 1.03462 | 1.4088  | 1.33273 | 1.18912 | 0.64563 |
| DHHC4  | 1.21813       | 0.81034 | 0.7217  | 1.3181  | 1.07412 | 1.56548 | 1.55943 | 1.20622 |
| DHHC5  | 0.313         | 0.257   | 0.288   | 0.297   | 0.786   | 0.541   |         |         |
| DHHC6  | 1.54192       | 1.20355 | 1.55892 | 1.7708  | 1.66859 | 1.11994 | 0.99101 | 0.95159 |
| DHHC7  | 0.405         | 0.346   | 0.379   | 0.251   | 0.484   | 0.387   |         |         |
| DHHC8  | 0.846         | 0.831   | 1.003   | 0.721   | 1.782   | 1.503   |         |         |
| DHHC9  | 1.46623       | 1.04689 | 1.00665 | 1.35965 | 0.97715 | 1.29883 | 1.34974 | 1.34672 |
| DHHC11 | 1.56811       | 0.83153 | 1.14984 | 1.24735 | 1.08744 | 1.67752 | 1.42311 | 1.34521 |
| DHHC12 | 1.41637       | 0.9284  | 0.9705  | 1.041   | 0.89606 | 1.29151 | 0.60926 | 1.00919 |
| DHHC13 | 1.69391       | 1.14719 | 1.22735 | 1.41335 | 1.2174  | 1.17385 | 1.1995  | 1.15851 |
| DHHC14 | 0.449         | 0.356   | 0.297   | 0.162   | 2.273   | 2.001   | 0.773   |         |
| DHHC15 | 1.09948       | 1.45053 | 1.22068 | 1.13914 | 1.75164 | 1.56669 | 1.3472  |         |
| DHHC16 | 1.40447       | 0.99099 | 1.18343 | 1.17952 | 1.02728 | 1.42327 | 1.4883  | 1.38363 |
| DHHC17 | 1.9776        | 1.04007 | 1.2779  | 1.4064  | 1.07577 | 1.49137 | 1.81552 | 0.8457  |
| DHHC18 | 1.81853       | 1.33358 | 1.38955 | 1.53766 | 1.07542 | 1.49862 | 1.31481 | 0.0214  |
| DHHC19 | 0.742         | 0.394   | 0.847   | 0.451   | 1.119   | 3.902   | 0.831   |         |
| DHHC20 | 0.394         | 0.258   | 0.242   | 0.225   | 0.805   | 0.507   |         |         |
| DHHC21 | 1.04645       | 1.38662 | 1.3659  | 1.1519  | 1.29586 | 1.55671 | 1.58719 | 0.46326 |
| DHHC22 | 0.912         | 0.94631 | 1.04056 | 1.23599 | 1.00051 | 1.71749 | 1.4347  | 0.65732 |
| DHHC23 | 1.27216       | 0.86225 | 1.09155 | 1.12419 | 1.02275 | 1.38442 | 1.58447 |         |
| DHHC24 | 1.24227       | 0.80293 | 0.98289 | 1.04155 | 0.81796 | 1.5549  | 1.63234 | 3.4013  |

Fig 4B

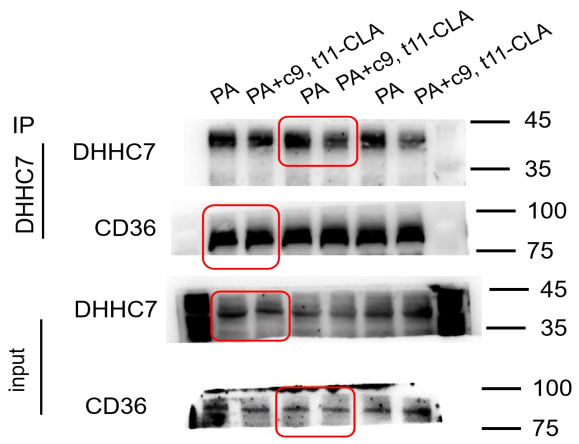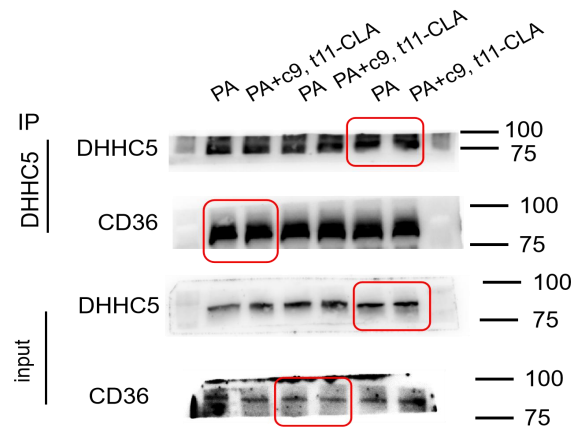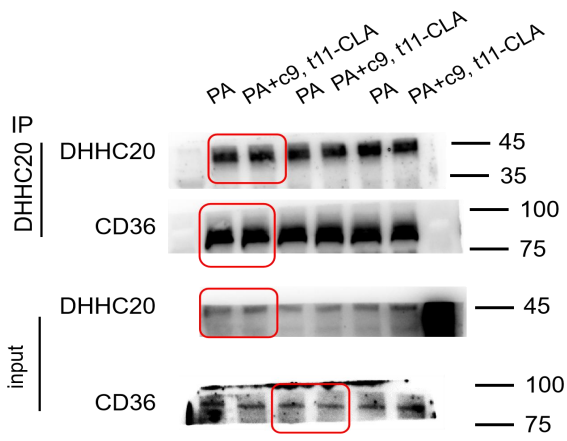

**Fig 5A**

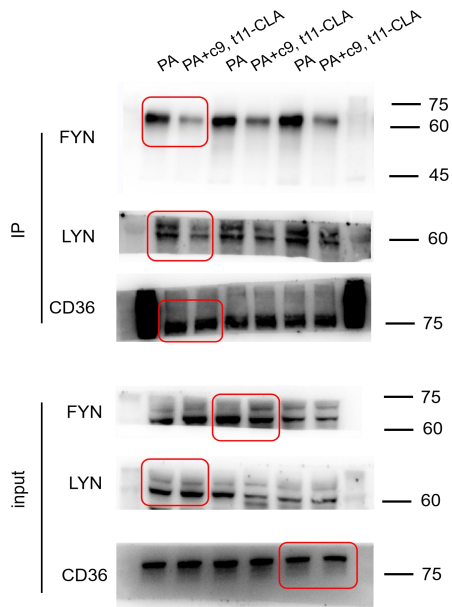

**Fig 5B**

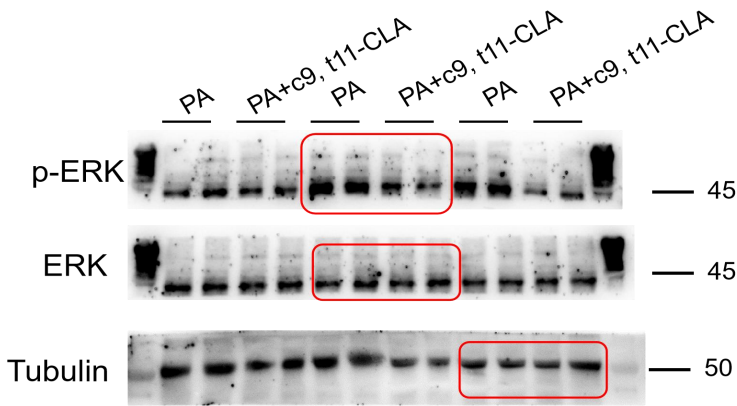

| Fig 5C | PA             | 0.35 | 0.68 | 1.63 | 0.89 | 1.24 | 1.21 |
|--------|----------------|------|------|------|------|------|------|
|        | PA+c9, t11-CLA | 0.46 | 0.47 | 0.94 | 0.36 | 0.19 | 0.27 |

**Fig 6A**

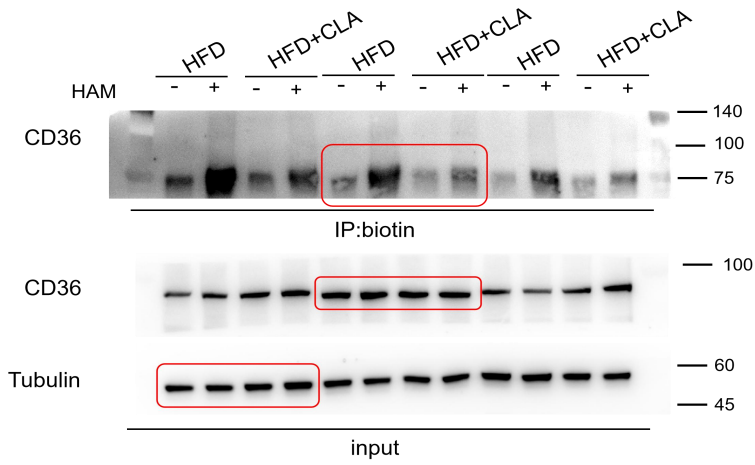

**Fig 6B**

|         |         |         |         |
|---------|---------|---------|---------|
| HFD     | 1.24205 | 0.48188 | 1.28209 |
| HFD+CLA | 0.16486 | 0.15685 | 0.12514 |

**Fig 6C**

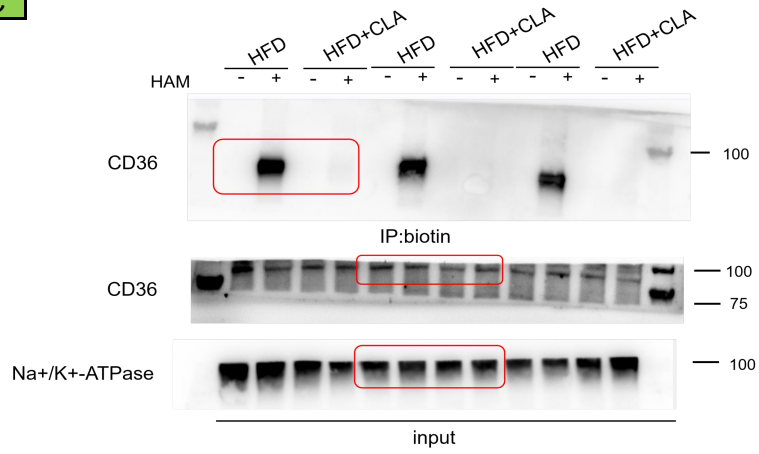

**Fig 6D**

|         |         |         |        |
|---------|---------|---------|--------|
| HFD     | 1.15746 | 1.24727 | 0.5955 |
| HFD+CLA | 0.01793 | 0.03958 | 0.0284 |

| Fig 6E | HFD        |         |         |         |         |         |         |         |
|--------|------------|---------|---------|---------|---------|---------|---------|---------|
| DHHC1  | 1.14050289 | 1.9445  | 1.00522 | 0.96846 | 1.20968 | 0.88149 | 0.53878 | 0.35832 |
| DHHC2  | 0.77462532 | 1.10419 | 1.17883 | 1.12728 | 1.30361 | 1.14971 | 0.85656 | 0.52716 |
| DHHC3  | 0.94656699 | 1.15185 | 0.98396 | 1.07254 | 1.19665 | 1.28219 | 0.82856 | 0.54666 |
| DHHC4  | 0.85223241 | 1.22813 | 1.1904  | 1.17362 | 1.19184 | 1.09912 | 0.7391  | 0.55745 |
| DHHC5  | 1.17430245 | 1.23527 | 0.80144 | 1.10412 | 1.20931 | 1.23567 | 0.78531 | 0.461   |
| DHHC6  | 0.82902699 | 1.11531 | 1.1842  | 1.03236 | 1.28987 | 1.13025 | 0.91509 | 0.50713 |
| DHHC7  | 0.96       | 1.333   | 1.00818 | 1.01574 | 0.91065 | 1.34332 | 0.81789 | 0.65849 |
| DHHC8  | 0.926      | 1.032   | 0.99    | 1.163   | 1.46    | 0.896   | 0.544   |         |
| DHHC9  | 0.88725632 | 1.187   | 1.19101 | 1.13182 | 1.35209 | 1.05856 | 0.73911 | 0.48056 |
| DHHC11 | 0.25335841 | 1.04656 | 0.92676 | 0.89824 | 0.97974 | 1.89299 | 1.18628 | 0.86188 |
| DHHC12 | 0.77601709 | 1.15386 | 0.90032 | 1.09742 | 1.57543 | 1.3185  | 0.83673 | 0.56382 |
| DHHC13 | 0.71983967 | 1.04844 | 1.20643 | 1.46147 | 1.2289  | 0.84943 | 0.51497 |         |
| DHHC14 | 0.88212127 | 1.11771 | 1.21696 | 1.09612 | 1.3135  | 1.0379  | 0.811   | 0.585   |
| DHHC15 | 0.92496622 | 1.45935 | 0.98816 | 0.94743 | 1.26    | 1.27673 | 0.7496  | 0.45484 |
| DHHC16 | 0.9393558  | 1.20013 | 1.09572 | 1.08427 | 1.27831 | 1.1656  | 0.75741 | 0.48145 |
| DHHC17 | 1.00646643 | 1.49969 | 1.29672 | 1.05741 | 1.24889 | 1.14772 | 0.42087 | 0.33382 |
| DHHC18 | 0.96688534 | 1.39831 | 1.33385 | 0.84774 | 1.22898 | 1.10325 | 0.62297 | 0.52564 |
| DHHC19 | 0.118      | 0.141   | 0.154   | 1.402   | 1.621   | 1.338   | 2.081   | 1.214   |
| DHHC20 | 0.917      | 1.738   | 1.046   | 0.747   | 1.092   | 1.013   | 1.077   | 0.43    |
| DHHC21 | 0.9241166  | 1.19375 | 1.16003 | 1.13009 | 1.20965 | 1.18568 | 0.71052 | 0.50086 |
| DHHC22 | 0.18691053 | 0.27737 | 0.26721 | 1.393   | 1.75209 | 1.43844 | 1.71755 | 0.98101 |
| DHHC23 | 0.86521692 | 1.26416 | 1.3076  | 1.16667 | 1.32618 | 0.99519 | 0.64319 | 0.45081 |
| DHHC24 | 0.83685263 | 1.36214 | 0.9467  | 0.87559 | 1.21859 | 1.35838 | 0.8511  | 0.57447 |

|        | HFD+CLA    |         |         |         |         |         |         |          |
|--------|------------|---------|---------|---------|---------|---------|---------|----------|
| DHHC1  | 0.70896091 | 1.44234 | 1.2725  | 2.25653 | 2.36846 | 0.69075 | 0.79515 | 0.83259  |
| DHHC2  | 0.81798358 | 1.16564 | 0.94145 | 1.47139 | 1.41775 | 1.06821 | 1.17617 | 1.37181  |
| DHHC3  | 0.68206404 | 1.10487 | 0.75146 | 1.48595 | 1.47549 | 0.92021 | 1.12536 | 1.33853  |
| DHHC4  | 0.71140948 | 1.08657 | 1.21543 | 1.85781 | 1.86024 | 1.1337  | 1.05465 | 1.50036  |
| DHHC5  | 0.2532431  | 0.39644 | 0.34898 | 0.60334 | 0.52956 | 0.31302 | 0.34805 | 0.33622  |
| DHHC6  | 0.80141364 | 1.46709 | 0.89297 | 1.7986  | 1.59028 | 1.13744 | 1.23984 | 1.34653  |
| DHHC7  | 0.24648022 | 0.30257 | 0.28499 | 0.40871 | 0.46222 | 0.22062 | 0.19479 | 0.25741  |
| DHHC8  | 0.641      | 1.147   | 1.16184 | 1.7114  | 1.90354 | 1.31083 | 1.42212 |          |
| DHHC9  | 0.62666624 | 1.13686 | 1.20338 | 1.80252 | 2.31361 | 0.88426 | 0.97727 | 1.23115  |
| DHHC11 | 0.39864819 | 0.88142 | 0.326   | 0.24345 | 0.57065 | 1.16879 | 1.64989 | 1.40448  |
| DHHC12 | 0.8335608  | 1.88022 | 0.90217 | 1.37944 | 1.47648 | 1.13915 | 1.21074 | 1.47093  |
| DHHC13 | 0.76247554 | 1.44996 | 1.38649 | 2.20074 | 2.34384 | 0.71353 | 0.84005 | 0.98281  |
| DHHC14 | 0.545      | 0.839   | 1.174   | 1.15877 | 1.81135 | 1.2022  | 1.22466 | 1.3179   |
| DHHC15 | 2.53633156 | 4.67724 | 0.57065 | 1.37029 | 0.96081 | 0.97897 | 1.08359 | 1.44656  |
| DHHC16 | 0.52611059 | 0.94663 | 0.9648  | 1.36952 | 1.83551 | 1.13974 | 1.23399 | 1.41506  |
| DHHC17 | 0.59127226 | 1.3275  | 1.17401 | 1.76925 | 1.59893 | 0.84528 | 0.9129  | 1.09795  |
| DHHC18 | 0.34080544 | 0.97974 | 0.6119  | 1.74854 | 1.78785 | 0.83655 | 1.3012  | 3.42E-03 |
| DHHC19 | 2.68       | 4.13483 | 5.41034 | 1.11579 | 1.07055 | 0.54557 | 0.09415 | 0.14858  |
| DHHC20 | 0.29393857 | 0.45229 | 0.44915 | 0.79142 | 0.70464 | 0.35358 | 0.35733 | 0.38439  |
| DHHC21 | 0.64025999 | 1.17273 | 1.06389 | 1.66583 | 1.89748 | 0.92171 | 1.04305 | 1.08933  |
| DHHC22 | 1.69716471 | 2.952   | 3.39019 | 1.15931 | 1.50924 | 0.57957 | 0.23944 | 0.27573  |
| DHHC23 | 0.66728107 | 1.36593 | 1.39609 | 2.06684 | 1.8697  | 0.81866 | 0.84705 | 1.10121  |
| DHHC24 | 0.70163938 | 1.35334 | 1.16126 | 1.90472 | 1.95556 | 1.11972 | 1.25476 | 1.40637  |



Fig 6F

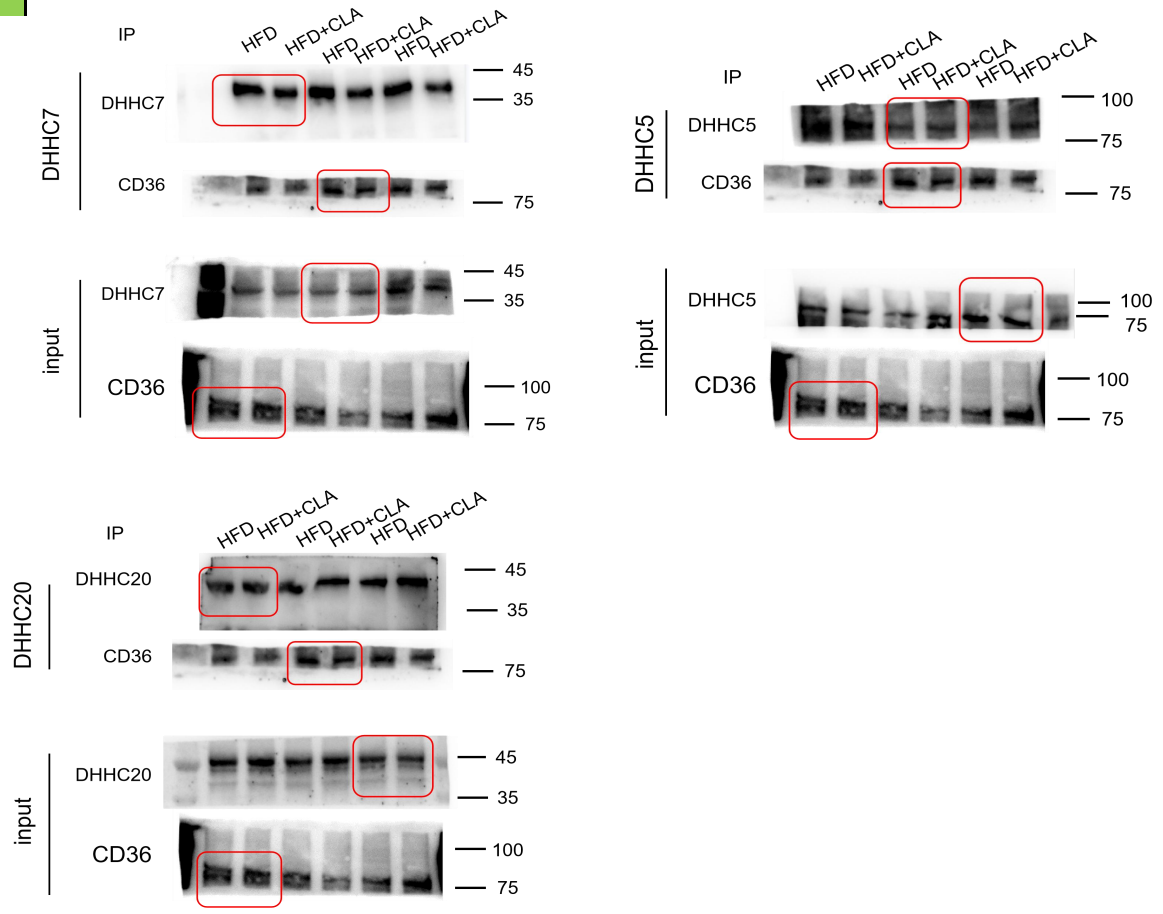

Fig 6G

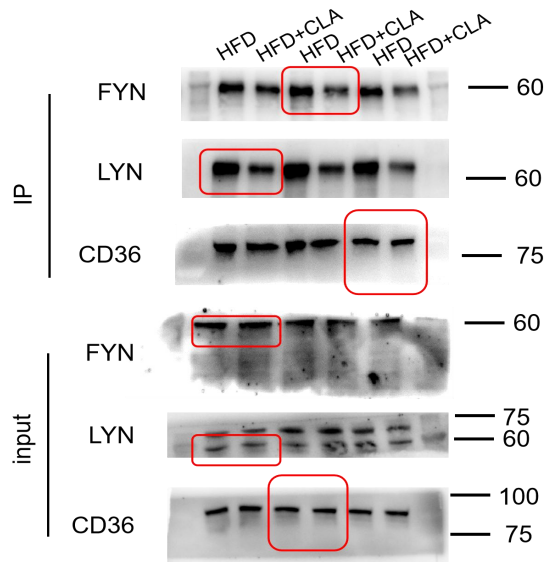

Fig 6H

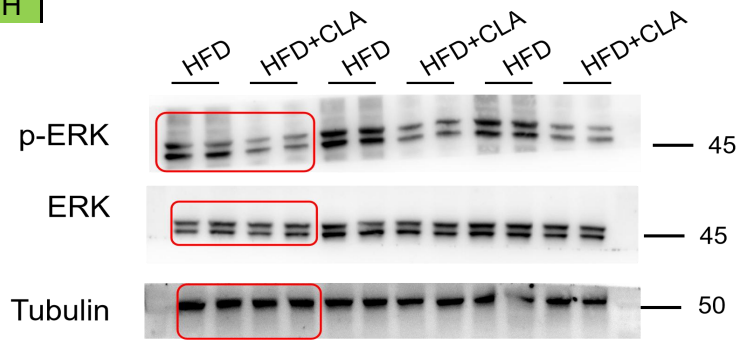

Fig 6I

|         |      |      |      |      |      |      |
|---------|------|------|------|------|------|------|
| HFD     | 1.18 | 1.14 | 1.19 | 1.16 | 0.71 | 0.62 |
| HFD+CLA | 0.28 | 0.51 | 0.44 | 0.51 | 0.37 | 0.35 |

|       |         |      |      |      |      |      |      |      |      |
|-------|---------|------|------|------|------|------|------|------|------|
| FS1 A | HFD     | 15.5 | 14.8 | 16.7 | 13.9 | 15.4 | 16.1 | 17.2 | 15.3 |
|       | HFD+CLA | 16.6 | 16.9 | 18.2 | 13.7 | 15.5 | 15.7 | 16.2 | 15.4 |

|       |         |      |      |       |      |      |       |       |       |
|-------|---------|------|------|-------|------|------|-------|-------|-------|
| FS1 B | HFD     | 37.5 | 34.4 | 32.03 | 36.1 | 36.7 | 35.23 | 34.68 | 43.88 |
|       | HFD+CLA | 30.2 | 27.9 | 32.1  | 26.5 | 24.3 | 26.1  | 30.5  | 28.6  |

|       |         |      |      |      |      |      |      |      |      |
|-------|---------|------|------|------|------|------|------|------|------|
| FS1 C | HFD     | 25.3 | 29.8 | 33.4 | 27.5 | 32.1 | 37.6 | 35.8 | 45.7 |
|       | HFD+CLA | 12.2 | 16.8 | 15.1 | 22.7 | 14.5 | 24.9 | 20.7 | 18.7 |

|       |      |         |         |         |         |         |         |         |       |
|-------|------|---------|---------|---------|---------|---------|---------|---------|-------|
| FS1 D |      | HFD     |         |         |         |         |         |         |       |
|       | iWAT | 1.49465 | 4.66176 | 3.29784 | 3.47067 | 2.98982 | 5.52529 | 4.46443 | 3.786 |
|       | vWAT | 2.89773 | 5.69385 | 5.82111 | 4.39587 | 6.17612 | 4.31504 | 7.17928 | 4.352 |

|  |         |         |         |         |         |         |         |         |
|--|---------|---------|---------|---------|---------|---------|---------|---------|
|  |         | HFD+CLA |         |         |         |         |         |         |
|  | 0.76573 | 0.66923 | 0.92928 | 0.78876 | 1.00612 | 1.42441 | 0.57097 | 0.64458 |
|  | 0.93271 | 1.73413 | 1.79435 | 3.93175 | 1.77065 | 3.93008 | 4.27197 | 3.21014 |
