# Supplementary material for: Conjugated linoleic acid (CLA) reduces intestinal fatty acid uptake and chylomicron formation in HFD-fed mice associated with the inhibition of DHHC7-mediated CD36 palmitoylation and the downstream ERK pathway
Source: Royal Society of Chemistry journal article supplement (doi:10.1039/d4fo00099d), 2024-01-01

**Figure 1E**

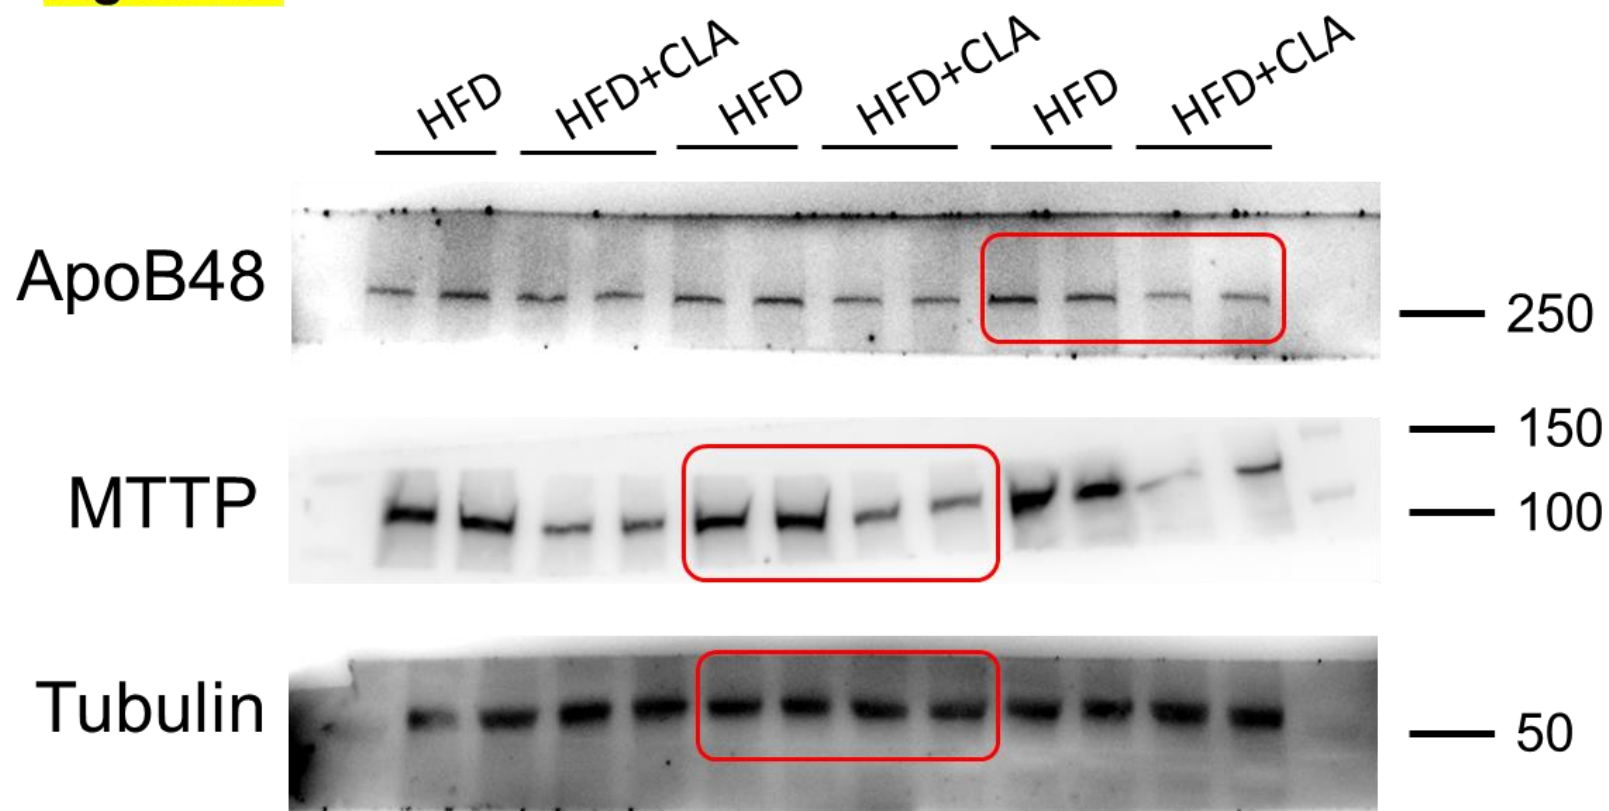

**Figure 2D**

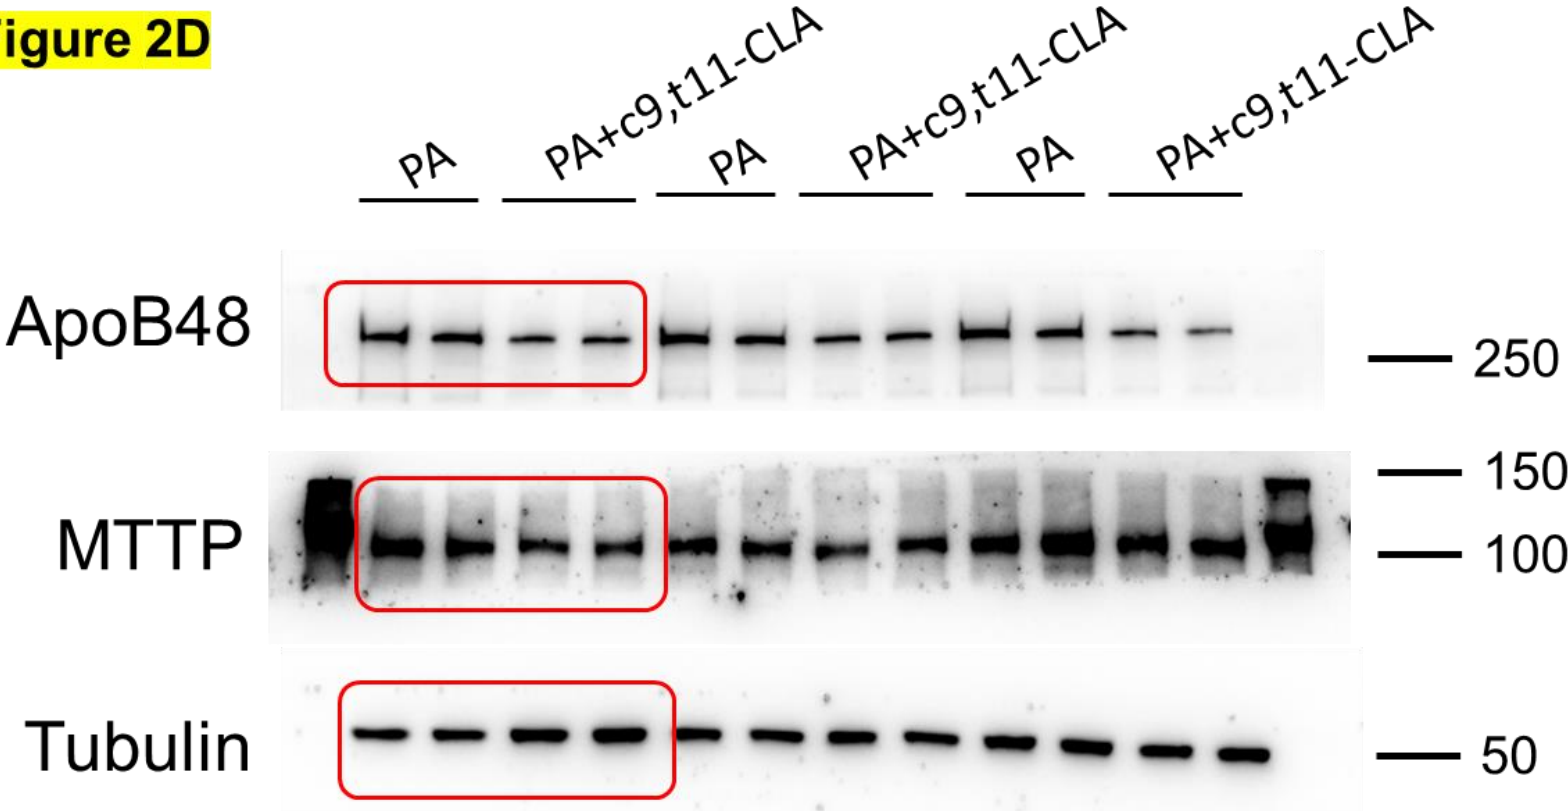





**Figure 3D**

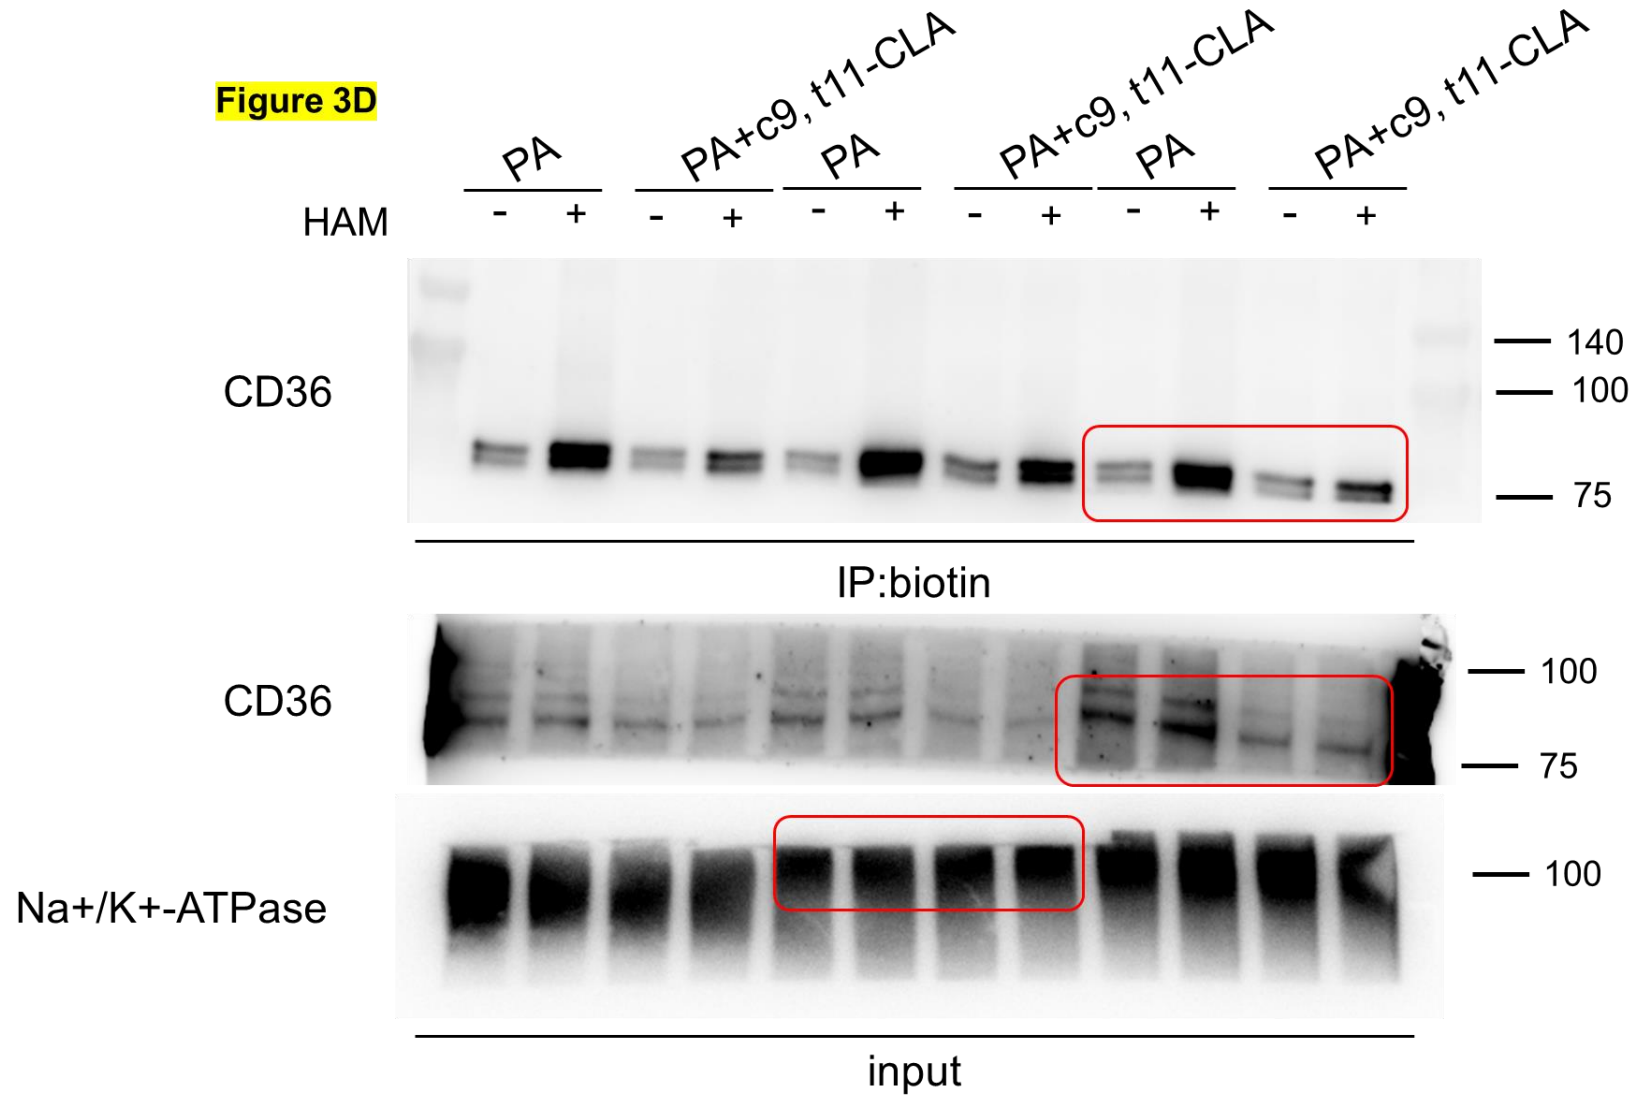

**Figure 4B**

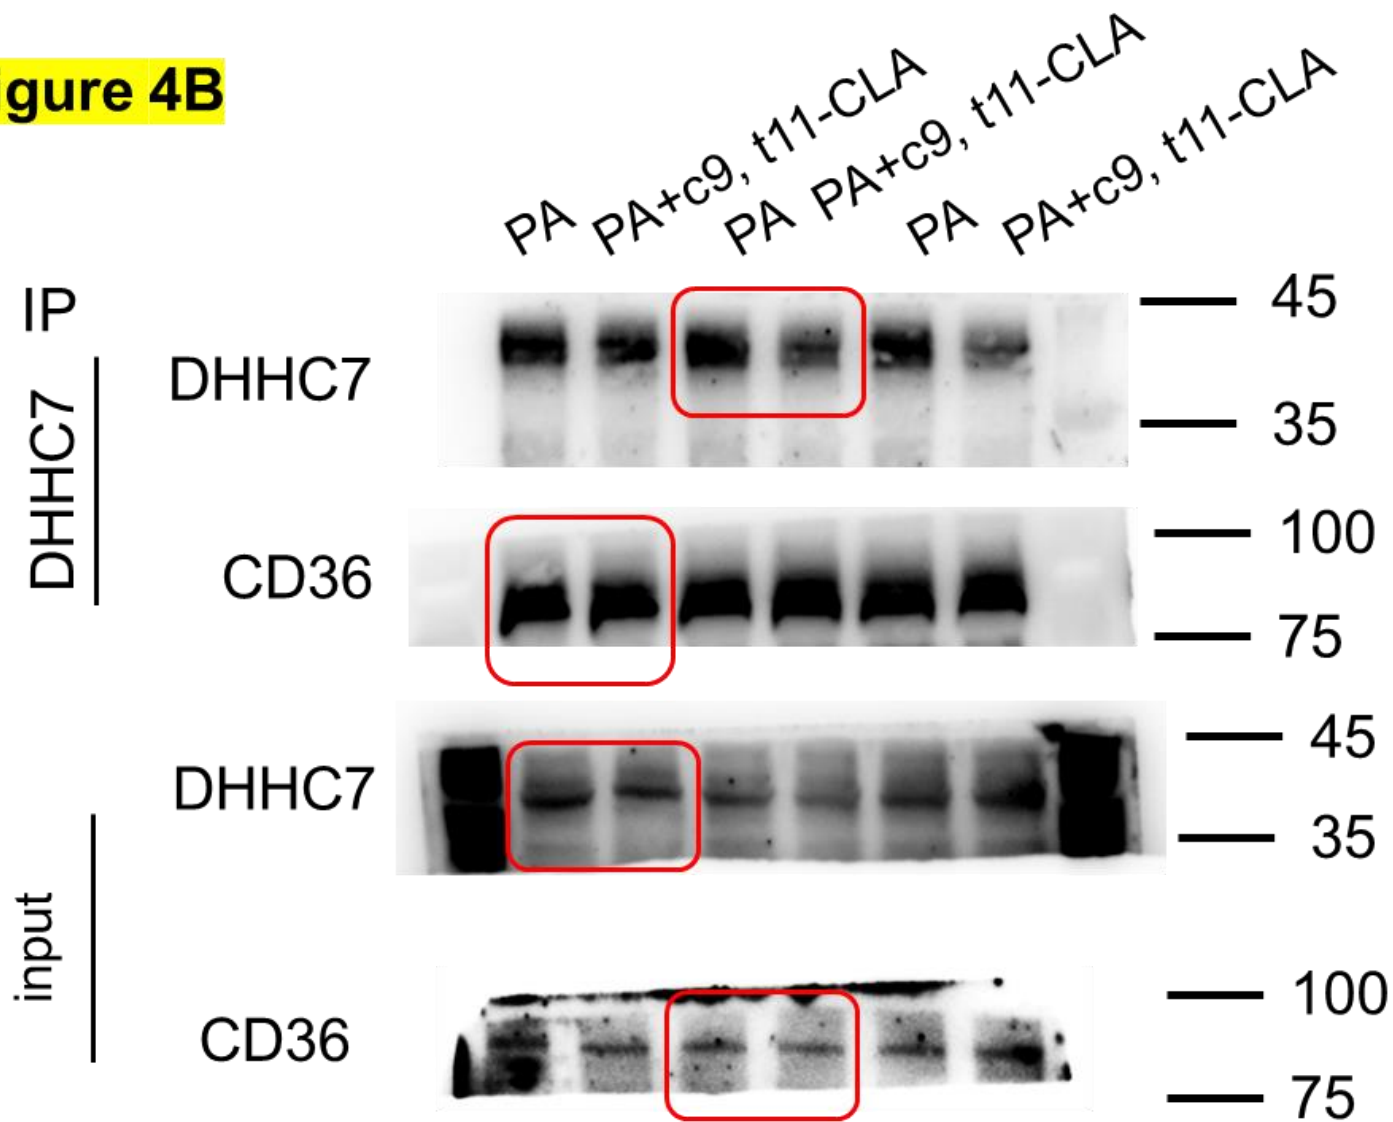

**Figure 4B**

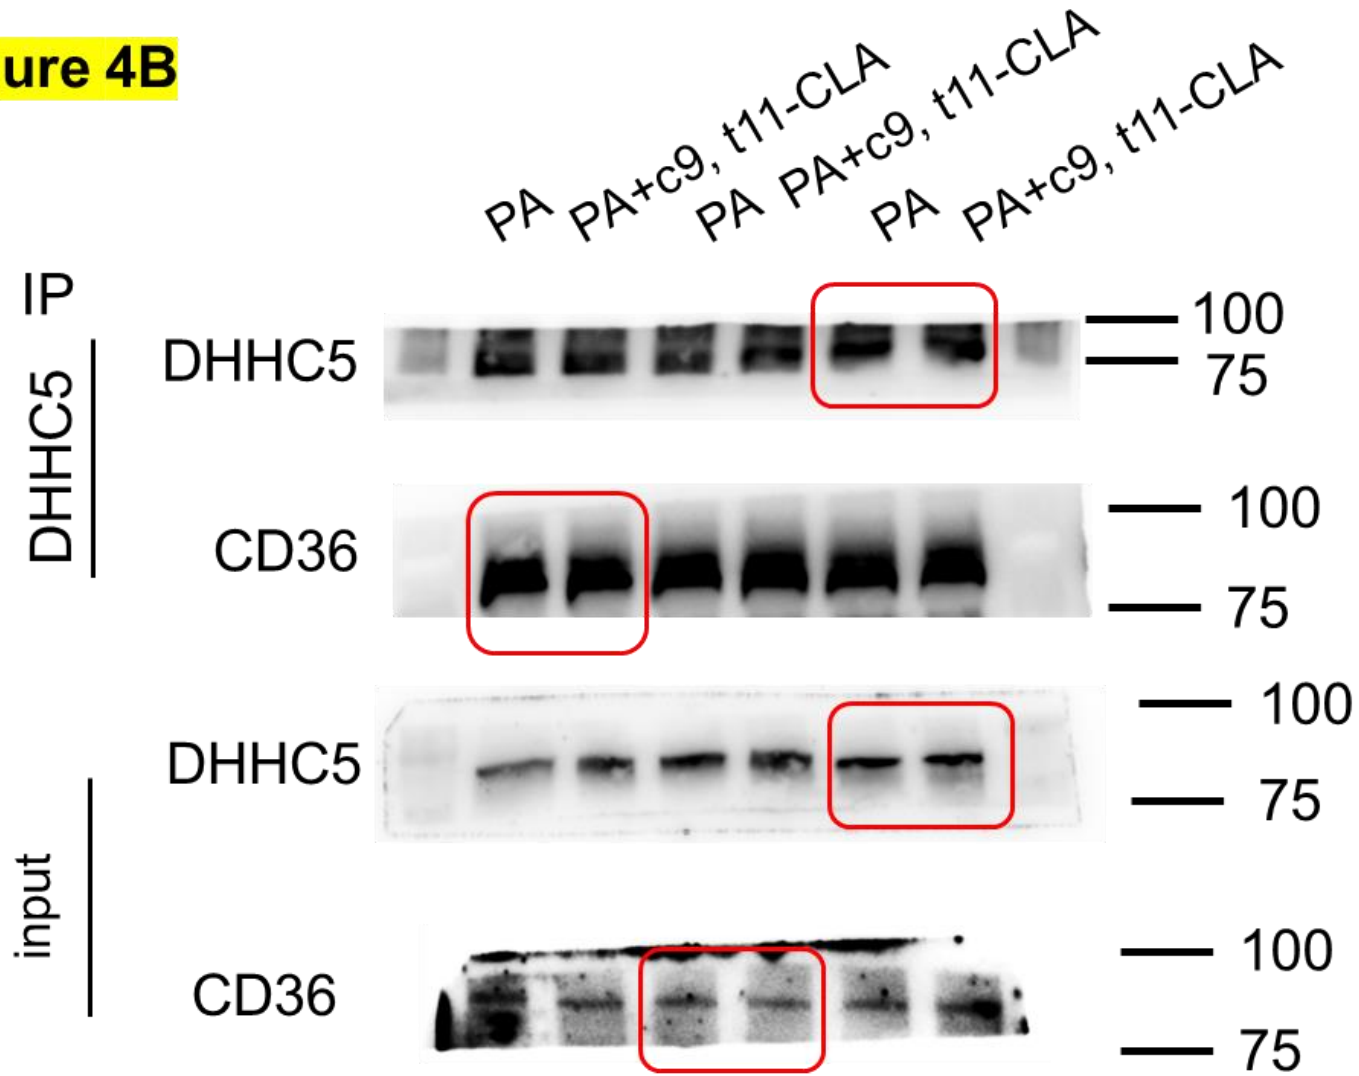

**Figure 4B**

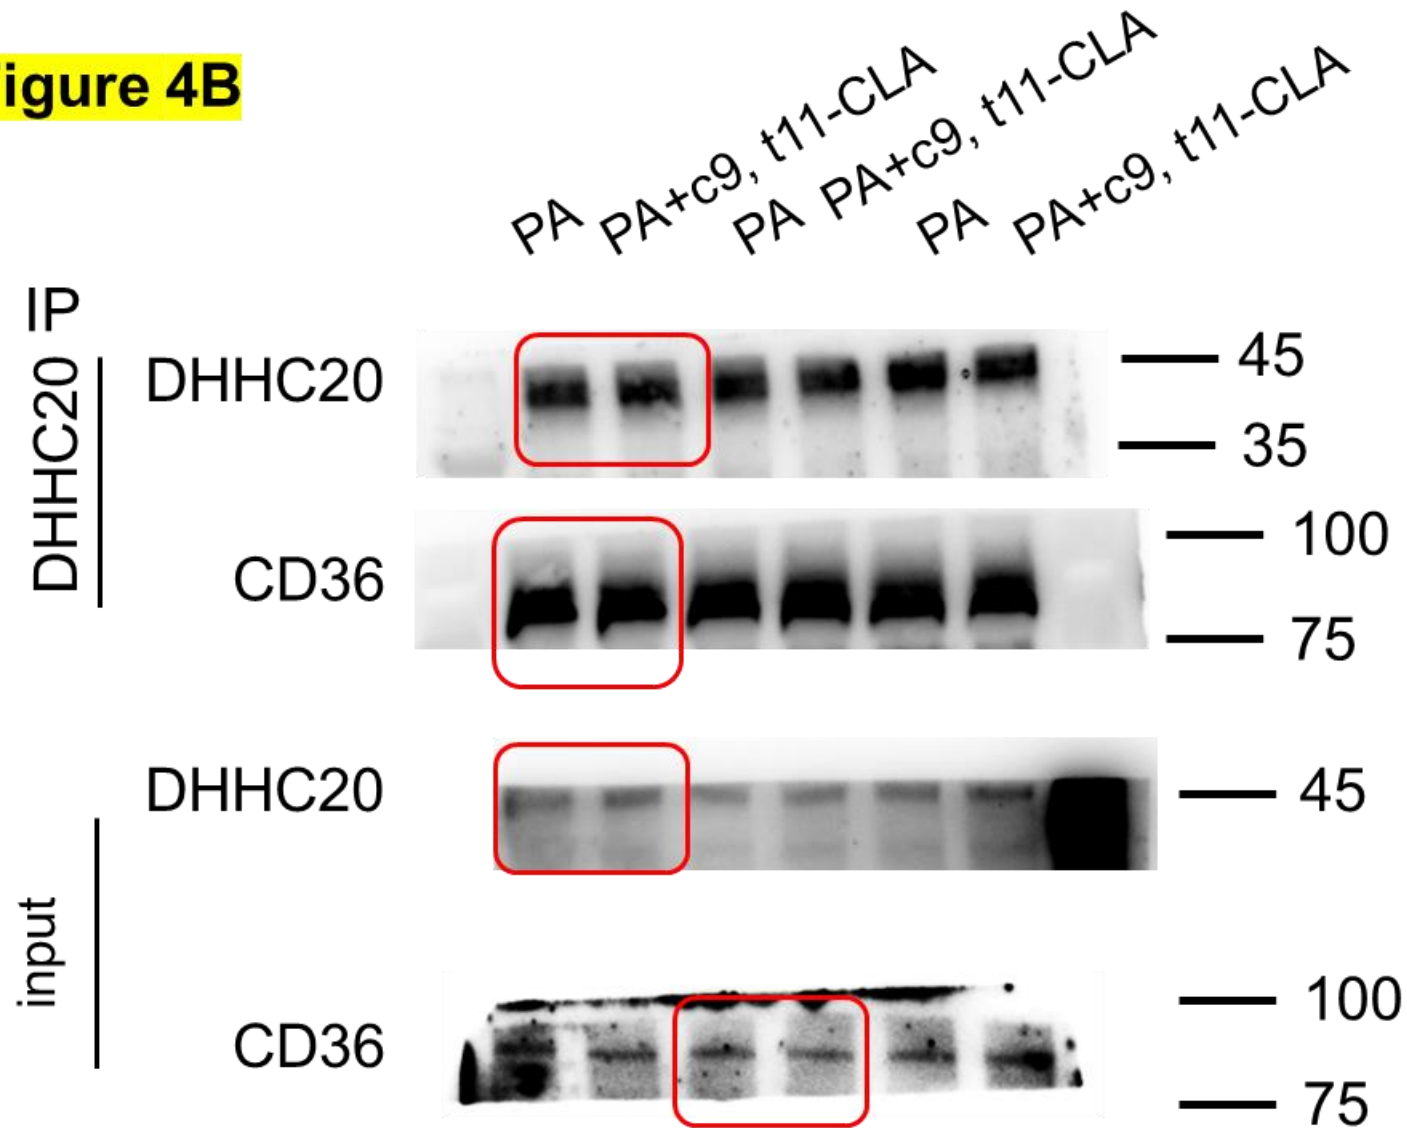



**Figure 5A**

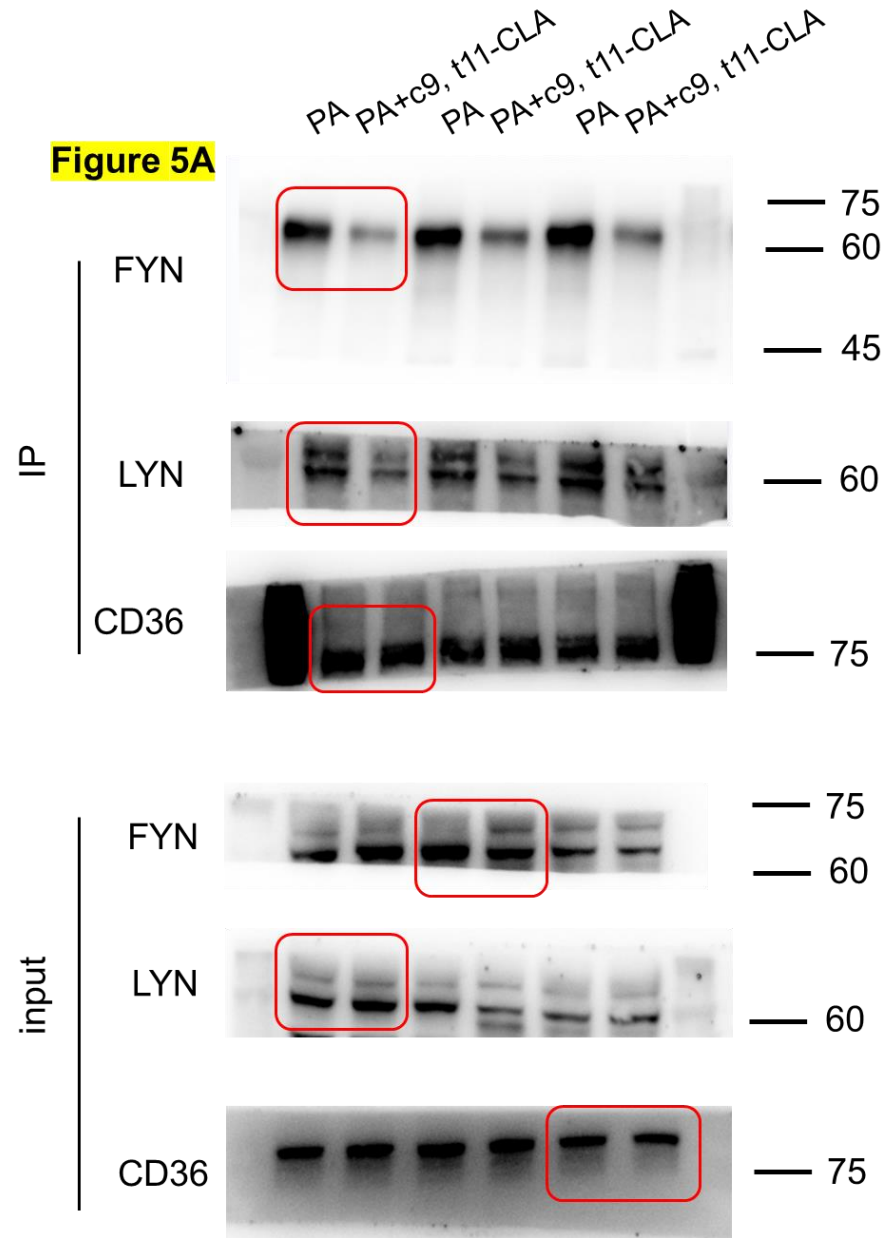



**Figure 6A**

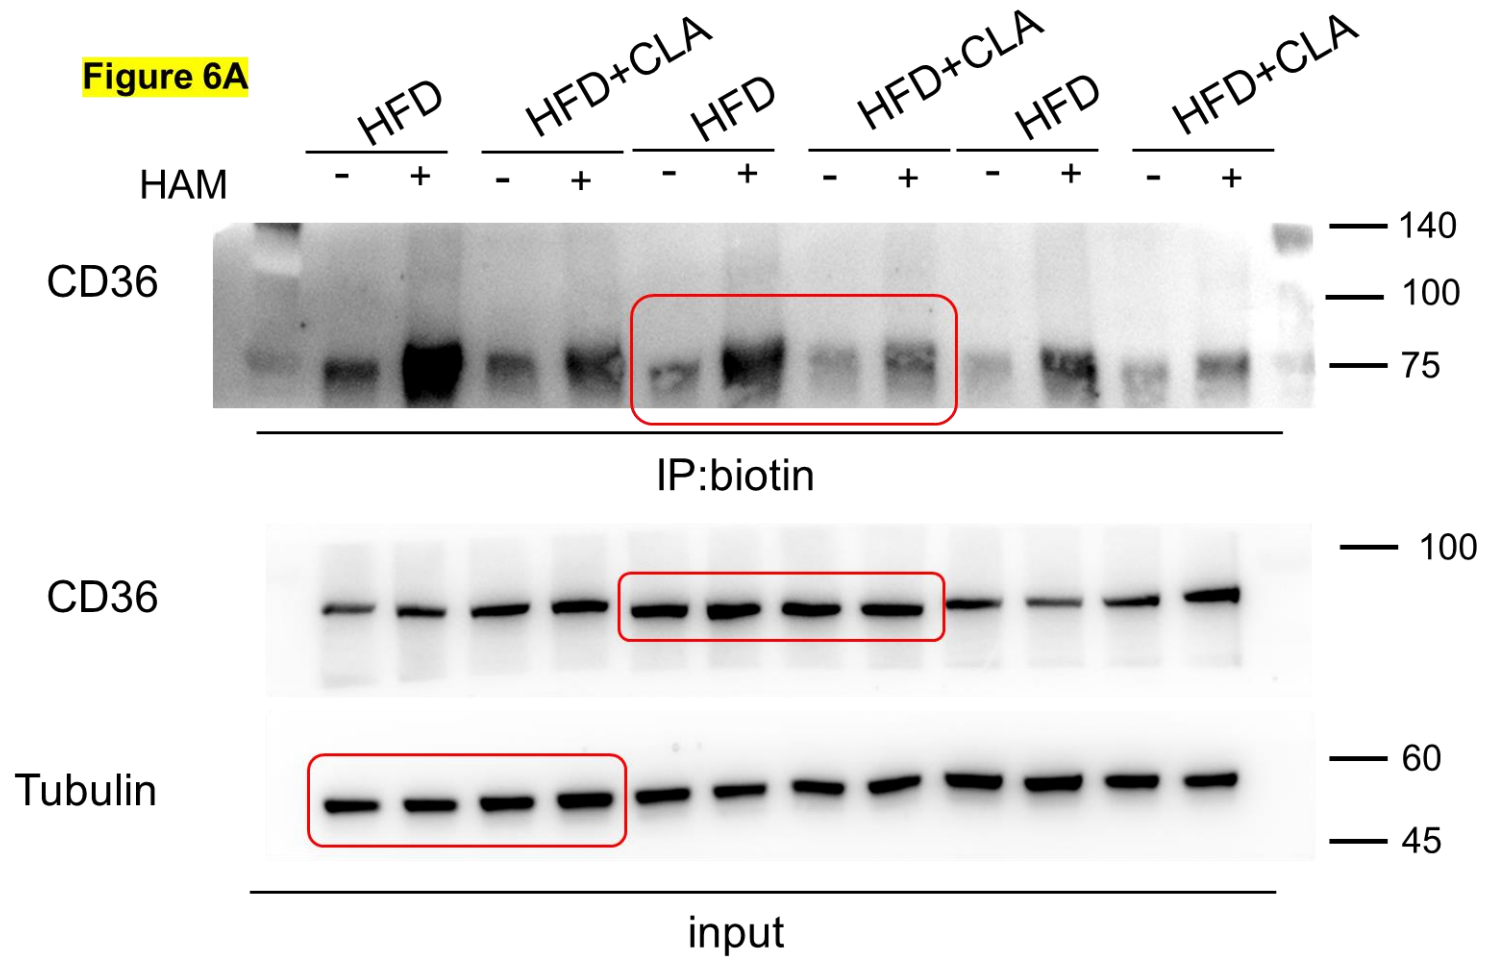



**Figure 6F**

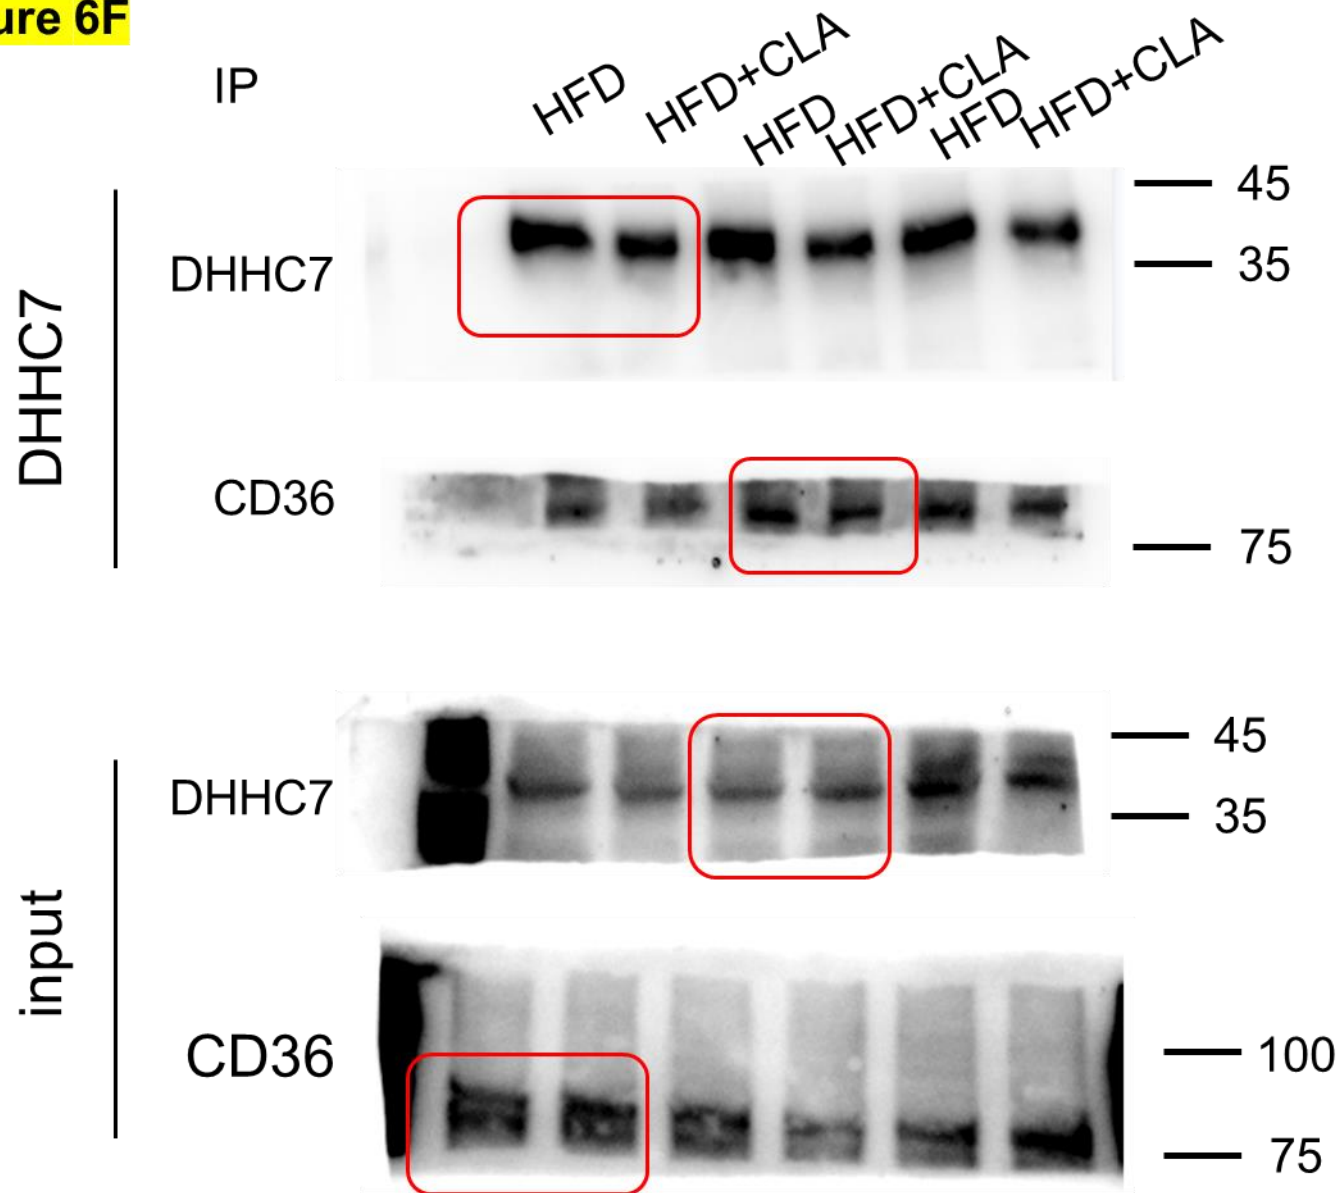

**Figure 6F**

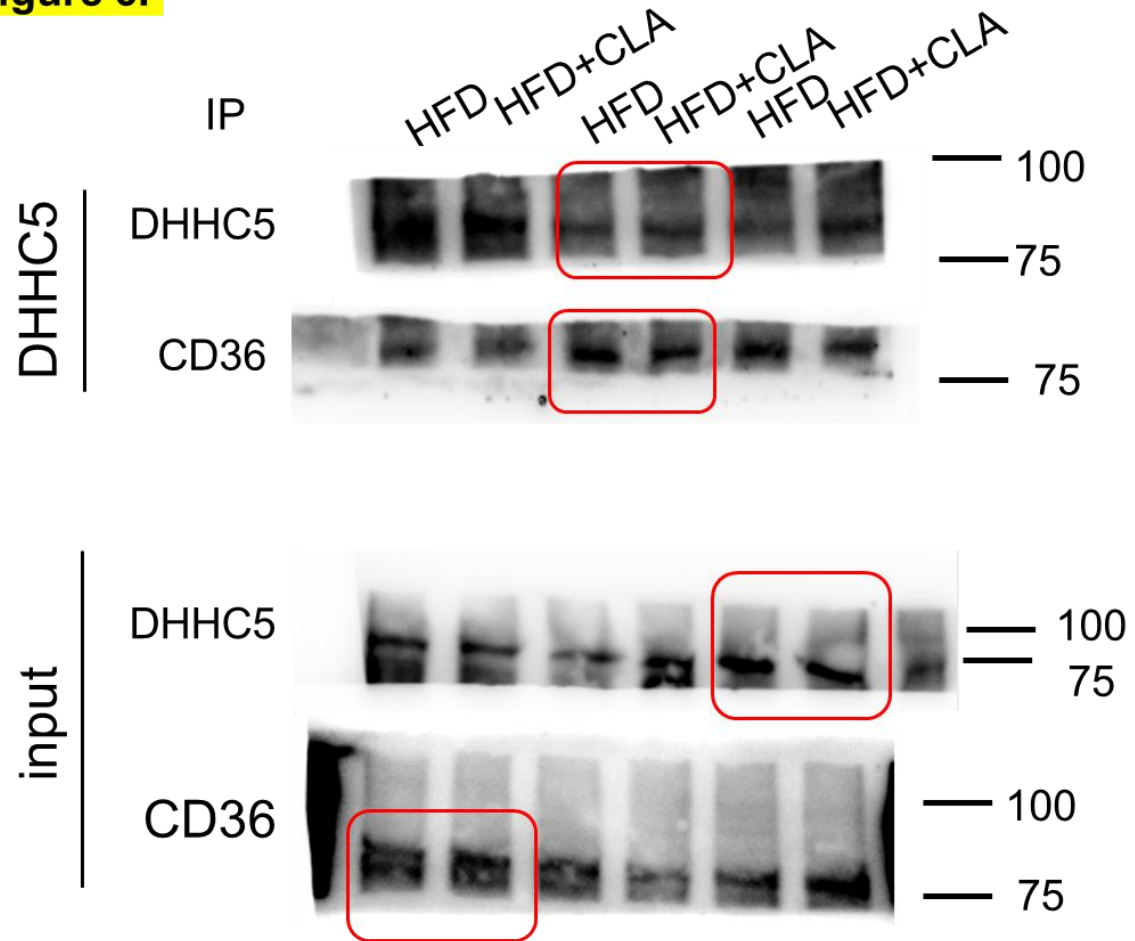

**Figure 6F**

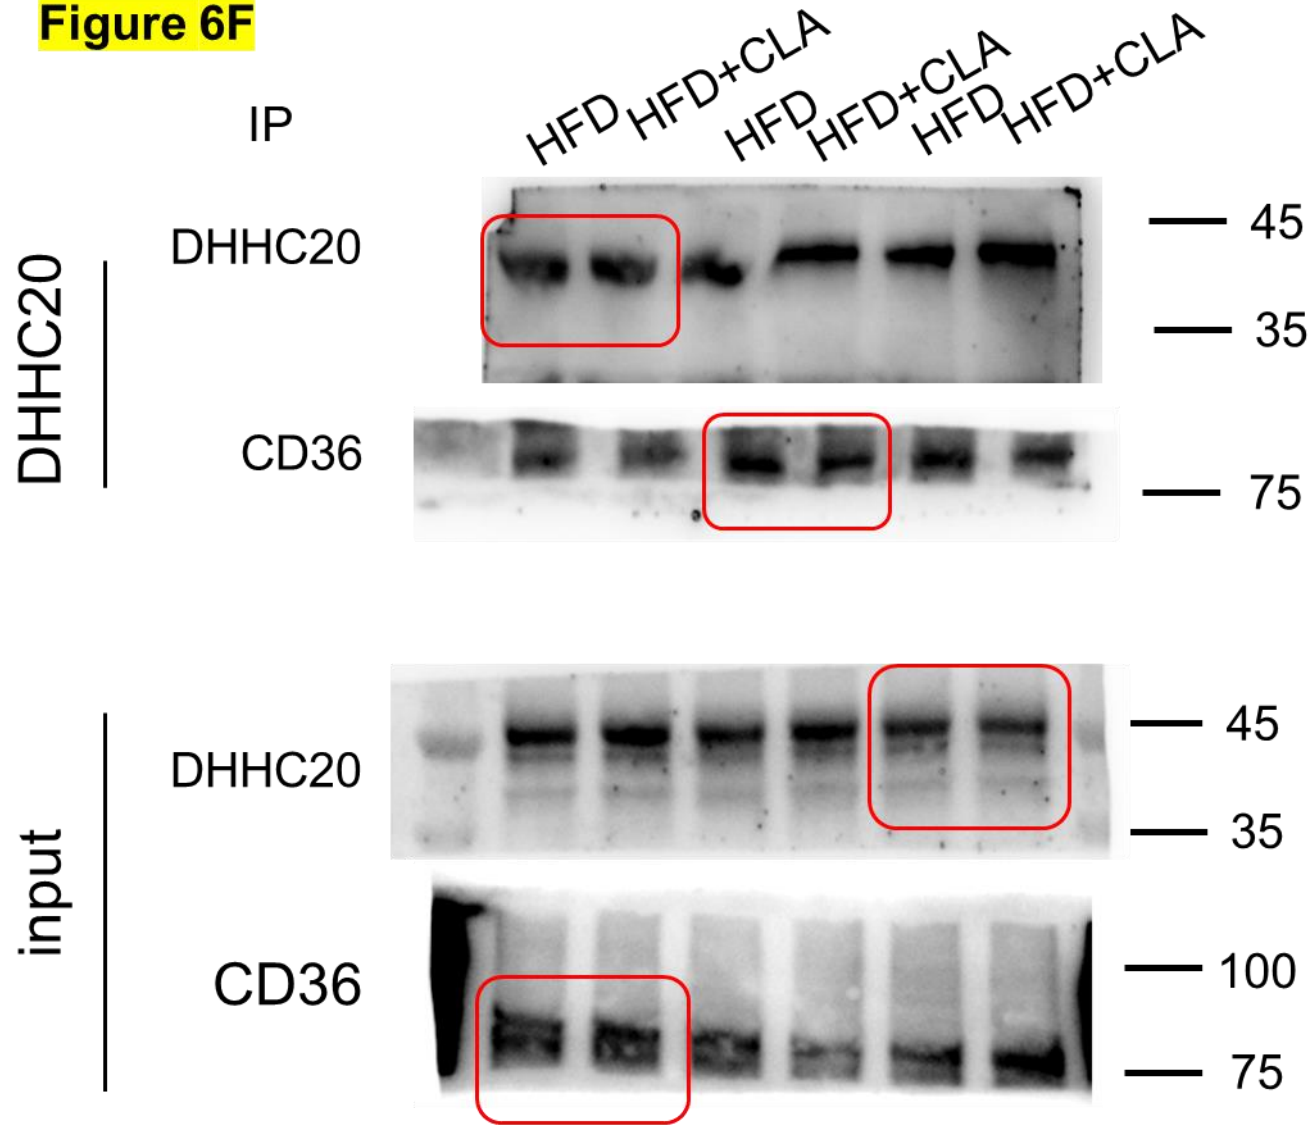

**Figure 6G**

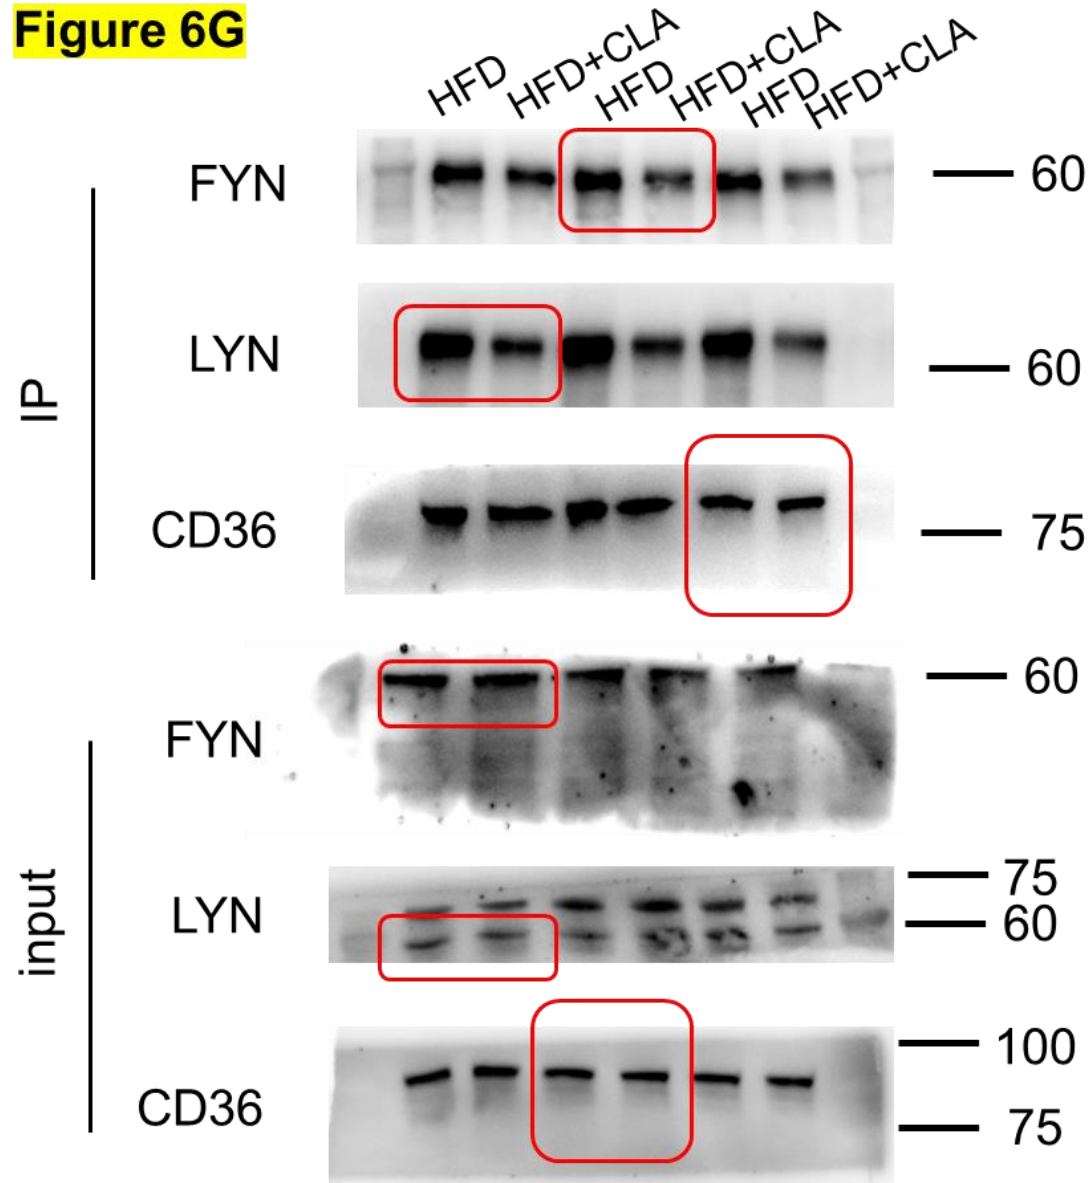



**Figure 6H**

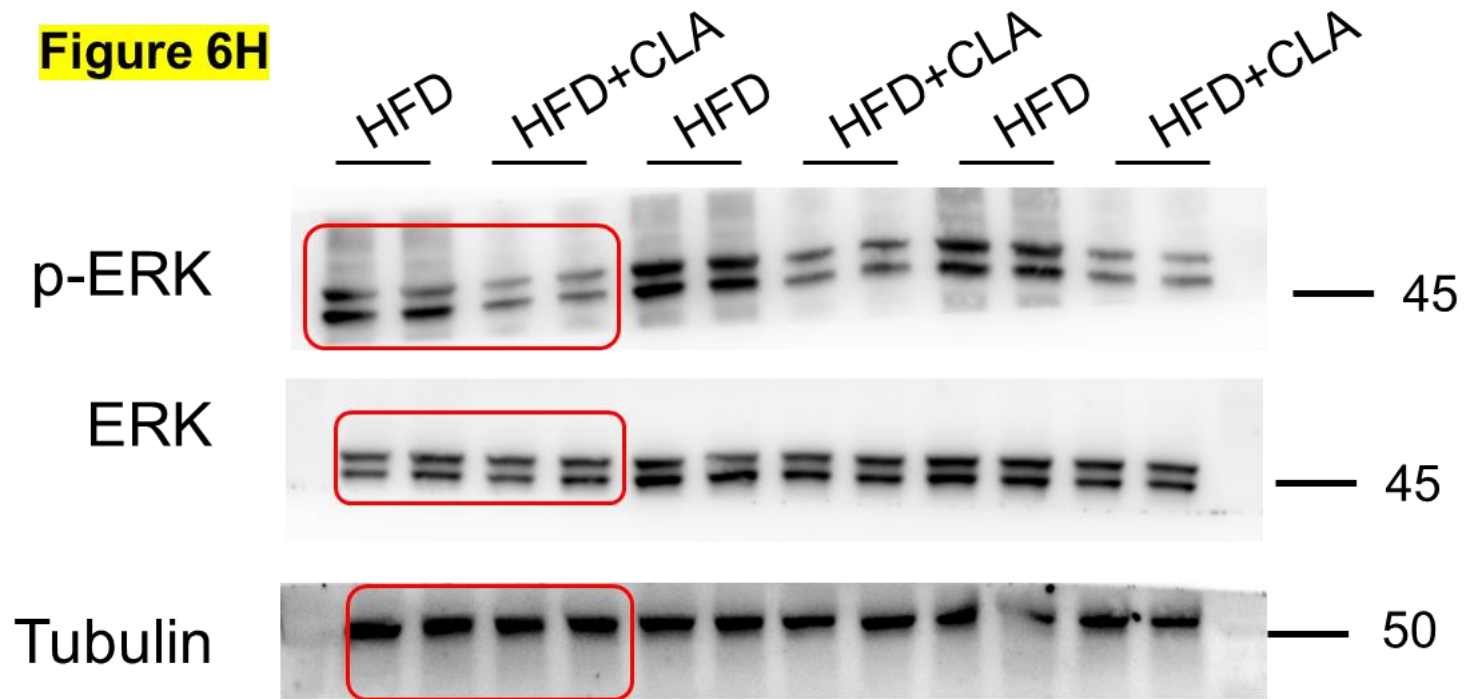

Supplement: d4fo00099d2.pdf [file d4fo00099d2.pdf]
